# Supplementary material
Source: ML conference proceedings conference paper supplement (https://openaccess.thecvf.com/content/CVPR2023/html/He_Frustratingly_Easy_Regularization_CVPR_2023_paper.html)
Supplement: Supplementary file 1 [file He_Frustratingly_Easy_Regularization_CVPR_2023_supplemental.zip]

Archive with 1 entries (1 files):
- PEER_CVPR23_Supplemental_Material.pdf
