# Supplementary material
Source: ML conference proceedings conference paper supplement (https://openaccess.thecvf.com/content/CVPR2023/html/He_Frustratingly_Easy_Regularization_CVPR_2023_paper.html)
Supplement: Supplementary file 1 [file He_Frustratingly_Easy_Regularization_CVPR_2023_supplemental.zip › PEER_CVPR23_Supplemental_Material.pdf]

## 7. Appendix: Theoretical Derivation

**Theorem 7.1** (Distinguishable Representation Property). *The similarity (defined as inner product  $\langle \cdot, \cdot \rangle$ ) between normalized representations  $\Phi(s, a; \Theta_+)$  of the  $Q$ -network and  $\mathbb{E}_{s', a'} \Phi(s', a'; \Theta'_+)$  satisfies*

$$\langle \Phi(s, a; \Theta_+), \mathbb{E}_{s', a'} \Phi(s', a'; \Theta'_+) \rangle \leq \frac{1}{\gamma} - \frac{r(s, a)^2}{2\|\Theta_{-1}\|^2}, \quad (11)$$

where  $s, a$  and  $\Theta_+$  are state, action, and parameters of the  $Q$ -network except for those of the last layer. While  $s', a', \Theta'_+$  are the state, action at the next time step, and parameters of the target  $Q$ -network except for those of the last layer. And  $\Theta_{-1}$  is the parameters of the last layer of  $Q$ -network.

*Proof.* Following eq. (3), the Bellman Equation eq. (2) can be rewritten as

$$\Phi(s, a; \Theta_+)^T \Theta_{-1} = r(s, a) + \gamma \mathbb{E}_{s', a'} \Phi(s', a'; \Theta'_+)^T \Theta_{-1}. \quad (12)$$

After the policy evaluation converges,  $\Theta$  and  $\Theta'$  satisfy  $\Theta = \Theta'$ . Thus we have

$$\begin{aligned} & (\Phi(s, a; \Theta_+)^T - \gamma \mathbb{E}_{s', a'} \Phi(s', a'; \Theta'_+)^T) \Theta_{-1} = r(s, a) \\ & \|(\Phi(s, a; \Theta_+)^T - \gamma \mathbb{E}_{s', a'} \Phi(s', a'; \Theta'_+)^T) \Theta_{-1}\| = |r(s, a)| \\ & \|(\Phi(s, a; \Theta_+)^T - \gamma \mathbb{E}_{s', a'} \Phi(s', a'; \Theta'_+)^T)\| \|\Theta_{-1}\| \cos \varphi = |r(s, a)| \\ & \|(\Phi(s, a; \Theta_+)^T - \gamma \mathbb{E}_{s', a'} \Phi(s', a'; \Theta'_+)^T)\| \|\Theta_{-1}\| \geq |r(s, a)| \\ & \|(\Phi(s, a; \Theta_+)^T - \gamma \mathbb{E}_{s', a'} \Phi(s', a'; \Theta'_+)^T)\| \geq \frac{|r(s, a)|}{\|\Theta_{-1}\|}. \end{aligned} \quad (13)$$

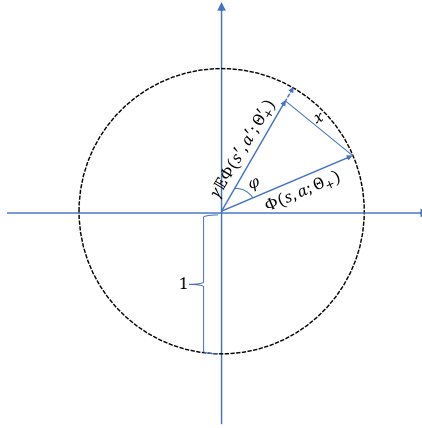

Figure 5. Normalized representation vectors.

Since the representation vectors are normalized, they should co-exist on some tangent plane as visualized in fig. 5. Let  $x$  be  $\|\Phi(s, a; \Theta_+) - \gamma \mathbb{E} \Phi(s', a'; \Theta'_+)\|$ , then we have  $x \geq \frac{|r(s, a)|}{\|\Theta_{-1}\|}$ , and

$$\cos \varphi = \frac{\|\Phi(s, a; \Theta_+)\|^2 + \|\gamma \mathbb{E} \Phi(s', a'; \Theta'_+)\|^2 - x^2}{2\|\Phi(s, a; \Theta_+)\| \|\gamma \mathbb{E} \Phi(s', a'; \Theta'_+)\|}. \quad (14)$$

Now we have

$$\begin{aligned}
\langle \Phi(s, a; \Theta_+), \gamma \mathbb{E}_{s', a'} \Phi(s', a'; \Theta'_+) \rangle &= \|\Phi(s, a; \Theta_+)\| \|\gamma \mathbb{E}_{s', a'} \Phi(s', a'; \Theta'_+)\| \cos \varphi \\
&= 1 \cdot \|\gamma \mathbb{E}_{s', a'} \Phi(s', a'; \Theta'_+)\| \cdot \frac{\|\Phi(s, a; \Theta_+)\|^2 + \|\gamma \mathbb{E} \Phi(s', a'; \Theta'_+)\|^2 - x^2}{2\|\Phi(s, a; \Theta_+)\| \|\gamma \mathbb{E} \Phi(s', a'; \Theta'_+)\|} \\
&= \frac{1 + \|\gamma \mathbb{E} \Phi(s', a'; \Theta'_+)\|^2 - x^2}{2} \\
&\leq \frac{1 + \gamma^2}{2} - \frac{r(s, a)^2}{2\|\Theta_{-1}\|^2} \\
&\leq 1 - \frac{r(s, a)^2}{2\|\Theta_{-1}\|^2}.
\end{aligned} \tag{15}$$

Thus, we have

$$\begin{aligned}
\langle \Phi(s, a; \Theta_+), \mathbb{E}_{s', a'} \Phi(s', a'; \Theta'_+) \rangle &\leq \frac{1}{\gamma} - \frac{r(s, a)^2}{2\gamma\|\Theta_{-1}\|^2} \\
&\leq \frac{1}{\gamma} - \frac{r(s, a)^2}{2\|\Theta_{-1}\|^2}.
\end{aligned} \tag{16}$$

□

In the following, for notational simplicity, we use  $X_i$  to denote  $S_i, A_i$  for all  $i \in [n]$ . For any  $f \in \mathcal{F}$ ,  $\|f\|_n^2 = 1/n \cdot \sum_{i=1}^n [f(X_i)]^2$ . Since both  $\hat{O}$  and  $TQ$  are bounded by  $V_{\max} = R_{\max}/(1 - \gamma)$ , we only need to consider the case where  $\log N_\delta \leq n$ .

Let  $f_1, \dots, f_{N_\delta}$  be the centers of minimal  $\delta$ -cover the of  $\mathcal{F}$ . By the definition of  $\delta$ -cover, there exists  $k^* \in [N_\delta]$  such that  $\|\hat{O} - f_{k^*}\|_\infty \leq \delta$ . Notice that  $k^*$  is a random variable since  $\hat{O}$  is obtained from data.

**Theorem 7.2** (One-step Approximation Error of PEER Update). *Suppose assumption 3.1 hold, let  $\mathcal{F} \subseteq \mathcal{B}(\mathcal{S} \times \mathcal{A})$  be a class of measurable function on  $\mathcal{S} \times \mathcal{A}$  that are bounded by  $V_{\max} = R_{\max}/(1 - \gamma)$ , and let  $\sigma$  be a probability distribution on  $\mathcal{S} \times \mathcal{A}$ . Also, let  $\{(S_i, A_i)\}_{i \in [n]}$  be  $n$  i.i.d. random variables in following  $\sigma$ . Based on  $\{(X_i, A_i, Y_i)\}_{i \in [n]}$ , we define  $\hat{O}$  as the solution to the lease-square with regularization problem,*

$$\min_{f \in \mathcal{F}} \frac{1}{n} \sum_{i=1}^n [f(S_i, A_i) - Y_i]^2 + \beta \Phi(s, a; \Theta) \mathbb{E} \Phi_{s', a'}(s', a'; \Theta'). \tag{17}$$

At the same time, for any  $\delta > 0$ , let  $\mathcal{N}(\delta, \mathcal{F}, \|\cdot\|_\infty)$  be the

$$\|\hat{O} - TQ\|_\sigma^2 \leq (1 + \epsilon)^2 \cdot \omega(\mathcal{F}) + C \cdot V_{\max}^2/(n \cdot \epsilon) + C' \cdot V_{\max} \cdot \delta + 2\beta \cdot G^2, \tag{18}$$

where  $C$  and  $C'$  are two absolute constants and is defined as

$$\omega(\mathcal{F}) = \sup_{g \in \mathcal{F}} \inf_{f \in \mathcal{F}} \|f - Tg\|_\sigma. \tag{19}$$

*Proof. Step (i):* We relate  $\mathbb{E}[\|\hat{O} - TQ\|_n^2]$  with its empirical counterpart  $\|\hat{O} - TQ\|_n^2$ . Since  $Y_i = R_i + \gamma \max_{a \in \mathcal{A}} Q(S_{i+1}, a)$  for each  $i \in [n]$ . By the definition of  $\hat{O}$ , for any  $f \in \mathcal{F}$  we have

$$\sum_{i=1}^n [Y_i - \hat{O}(X_i)]^2 + \beta \Phi^\top(X_i; \Theta_\delta) \mathbb{E} \Phi_{X_{i+1}}(X_{i+1}; \Theta'_\delta) \leq \sum_{i=1}^n [Y_i - f(X_i)]^2 + \beta \Phi^\top(X_i; \Theta_f) \mathbb{E} \Phi_{X_{i+1}}(X_{i+1}; \Theta'_f). \tag{20}$$

For each  $i \in [n]$ , we define  $\xi_i = Y_i - (TQ)(X_i)$ . Then eq. (20) can be rewritten as

$$\|\hat{O} - TQ\|_n^2 \leq \|f - TQ\|_n^2 + \frac{1}{n} \sum_{i=1}^n \left[ 2\xi_i [\hat{O}(X_i) - f(X_i)] + \beta \left( \Phi^\top(X_i; \Theta_f) \mathbb{E} \Phi^\top(X_{i+1}; \Theta'_f) - \Phi^\top(X_i; \Theta_\delta) \mathbb{E} \Phi(X_{i+1}; \Theta'_\delta) \right) \right]. \tag{21}$$

We start by bounding the value of  $\left(\Phi^\top(X_i; \Theta_f) \mathbb{E} \Phi(X_{i+1}; \Theta'_f) - \Phi^\top(X_i; \Theta_{\hat{O}}) \mathbb{E} \Phi(X_{i+1}; \Theta'_{\hat{O}})\right)$ . First, by Cauchy-Schwartz Inequality, we have

$$\left|\Phi(X_i; \Theta_f) \mathbb{E} \Phi(X_{i+1}; \Theta'_f)\right| \leq \sqrt{\|\Phi(X_i; \Theta_f, +)\|^2} \cdot \sqrt{\|\mathbb{E} \Phi(X_{i+1}; \Theta'_{f,+})\|^2} \leq G^2, \quad (22)$$

where we used assumption 3.1 for the second inequality. Thus, by triangle inequality, we have

$$\left|\Phi^\top(X_i; \Theta_f) \mathbb{E} \Phi(X_{i+1}; \Theta'_f) - \Phi^\top(X_i; \Theta_{\hat{O}}) \mathbb{E} \Phi(X_{i+1}; \Theta'_{\hat{O}})\right| \leq 2G^2. \quad (23)$$

And eq. (21) reduces to

$$\|\hat{O} - TQ\|_n^2 \leq \|f - TQ\|_n^2 + \frac{2}{n} \sum_{i=1}^n [\xi_i [\hat{O}(X_i) - f(X_i)] + \beta G^2]. \quad (24)$$

Then we bound the rest on the right side of eq. (21). Since both  $f$  and  $Q$  are deterministic, we have  $\mathbb{E}(\|f - TQ\|_n^2) = \|f - TQ\|_{\mathcal{T}}^2$ . Moreover, since  $\mathbb{E}(\xi_i | X_i) = 0$  by definition, we have  $\mathbb{E}[\xi_i \cdot g(X_i)] = 0$  for any bounded and measurable function  $g$ . Thus it holds that

$$\mathbb{E} \left\{ \sum_{i=1}^n \xi_i \cdot [\hat{O}(X_i) - f(X_i)] \right\} = \mathbb{E} \left\{ \sum_{i=1}^n \xi_i \cdot [\hat{O} - (TQ)(X_i)] \right\}. \quad (25)$$

In addition, by triangle inequality and eq. (25) we have

$$\left| \mathbb{E} \left\{ \sum_{i=1}^n \xi_i \cdot [\hat{O}(X_i) - (TQ)(X_i)] \right\} \right| \leq \left| \mathbb{E} \left\{ \sum_{i=1}^n \xi_i \cdot [\hat{O} - f_{k^*}(X_i)] \right\} \right| + \left| \mathbb{E} \left\{ \sum_{i=1}^n \xi_i \cdot [f_{k^*}(X_i) - (TQ)(X_i)] \right\} \right|, \quad (26)$$

where  $f_{k^*}$  satisfies  $\|f_{k^*}\| \leq \delta$ . In the following, we upper bound the two terms on the right side of eq. (26) respectively. For the first term, by applying the Cauchy-Schwarz inequality twice, we have

$$\begin{aligned} \left| \mathbb{E} \left\{ \sum_{i=1}^n \xi_i \cdot [\hat{O} - f_{k^*}(X_i)] \right\} \right| &\leq \sqrt{n} \cdot \left| \mathbb{E} \left[ \left( \sum_{i=1}^n \xi_i^2 \right)^{1/2} \cdot \|\hat{O} - f_{k^*}\|_n \right] \right| \\ &\leq \sqrt{n} \cdot [\mathbb{E}(\sum_{i=1}^n \xi_i^2)]^{1/2} \cdot [\mathbb{E}(\|\hat{O} - f_{k^*}\|_n^2)]^{1/2} \leq n\delta \cdot [\mathbb{E}(\xi_i^2)]^{1/2}. \end{aligned} \quad (27)$$

where we use the fact that  $\{\xi_i\}_{i \in [n]}$  have the same marginal distributions and  $\|\hat{O} - f_{k^*}\|_n \leq \delta$ . Since both  $Y_i$  and  $TQ$  are bounded by  $V_{\max}$ ,  $\xi_i$  is a bounded random variable by its definition. Thus, there exists a constant  $C_\xi > 0$  depending on  $\xi$  such that  $\mathbb{E}(\xi_i^2) \leq C_\xi^2 \cdot V_{\max}^2$ . Then eq. (27) implies

$$\left| \mathbb{E} \left\{ \sum_{i=1}^n \xi_i \cdot [\hat{O}(X_i) - f_{k^*}(X_i)] \right\} \right| \leq C_\xi \cdot V_{\max} \cdot n\delta. \quad (28)$$

It remains to upper bound the second term on the right side of eq. (26). We define  $N_\delta$  self-normalized random variables

$$Z_j = \frac{1}{\sqrt{n}} \sum_{i=1}^n \xi_i \cdot [f_j(X_i) - (TQ)(X_i)] \cdot \|f_j - (TQ)\|_n^{-1} \quad (29)$$

for all  $j \in [N_\delta]$ . Here recall that  $\{f_j\}_{j \in [N_\delta]}$  are the centers of the minimal  $\delta$ -covering of  $\mathcal{F}$ . Then we have

$$\begin{aligned} \left| \mathbb{E} \left\{ \sum_{i=1}^n \xi_i \cdot [f_{k^*}(X_i) - (TQ)(X_i)] \right\} \right| &= \sqrt{n} \cdot \mathbb{E}[\|f_{k^*} - TQ\|_n \cdot |Z_{k^*}|] \\ &\leq \sqrt{n} \cdot \mathbb{E} \{ [\|\hat{O} - TQ\|_n + \|\hat{O} - f_{k^*}\|_n] \cdot |Z_{k^*}| \} \leq \sqrt{n} \cdot \{ [\|\hat{O} - TQ\|_n + \delta] \cdot |Z_{k^*}| \}, \end{aligned} \quad (30)$$

where the first inequality follows from triangle inequality and the second follows from the fact that  $\leq \delta$  eq. (30), we obtain

$$\begin{aligned} \mathbb{E} \{ [\|\hat{O} - TQ\|_n + \delta] \cdot |Z_{k^*}| \} &\leq \left( \mathbb{E} \{ [\|\hat{O} - TQ\|_n + \delta]^2 \} \right)^{1/2} \cdot [\mathbb{E}(Z_{k^*}^2)]^{1/2} \\ &\leq \left( \mathbb{E} [\|\hat{O} - TQ\|_n^2]^{1/2} + \delta \right) \cdot [\mathbb{E}(\max_{j \in [n]} Z_j^2)]^{1/2}, \end{aligned} \quad (31)$$

where the last inequality follows from

$$\mathbb{E} [\|\hat{O} - TQ\|_n] \leq \left\{ \mathbb{E} [\|\hat{O} - TQ\|_n^2] \right\}^{1/2}. \quad (32)$$

Moreover, since  $\xi_i$  is centered conditioning on  $\{X_i\}$ ,  $\xi_i$  is a sub-Gaussian random variable. Specifically, there exists an absolute constant  $H_\xi > 0$  such that  $\|\xi_i\|_{\psi_2} \leq H_\xi \cdot V_{\max}$  for each  $i \in [n]$ . Here the  $\psi_2$ -norm of a random variable  $W$  is defined as

$$\|W\|_{\psi_2} = \sup_{p \geq 1} p^{-1/2} [\mathbb{E}(|W|^p)]^{1/p}. \quad (33)$$

By the definition of  $Z_j$  in eq. (29), conditioning on  $\{X_i\}_{i \in [n]}$ ,  $\xi_i \cdot [f_j(X_i) - (TQ)(X_i)]$  is a centered and sub-Gaussian random variable with

$$\|\xi_i \cdot [f_j(X_i) - (TQ)(X_i)]\|_{\psi_2} \leq H_\xi \cdot V_{\max} \cdot |f_j(X_i) - (TQ)(X_i)|. \quad (34)$$

Moreover, since  $Z_j$  is a summation of independent sub-Gaussian random variables, by Lemma 5.9 of [59], the  $\psi_2$ -norm of  $Z_j$  satisfies

$$\|Z_j\|_{\psi_2} \leq C \cdot H_\xi \cdot V_{\max} \cdot \|f_j - TQ\|_n^{-1} \cdot \left[ \frac{1}{n} \sum_{i=1}^n |f_j(X_i) - (TQ)(X_i)|^2 \right]^{1/2} \leq C \cdot H_\xi \cdot V_{\max}, \quad (35)$$

where  $C > 0$  is an absolute constant. Furthermore, by Lemma 5.14 and 5.15 of [59],  $Z_j^2$  is a sub-exponential random variable, and its moment-generating function is bounded by

$$\mathbb{E} \left[ \exp(t \cdot Z_j^2) \right] \leq \exp(C \cdot t^2 \cdot H_\xi^4 \cdot V_{\max}^4) \quad (36)$$

for any  $t$  satisfying  $C' \cdot |t| \cdot H_\xi^2 \cdot V_{\max}^2 \leq 1$ , where  $C$  and  $C'$  are two positive absolute constants. Moreover, by Jensen's Inequality, we bound the moment-generating function of  $\max_{j \in [N_\delta]} Z_j^2$  by

$$\mathbb{E} \left[ \exp(t \cdot \max_{j \in [N_\delta]} Z_j^2) \right] \leq \sum_{j \in [N_\delta]} \mathbb{E}[\exp(t \cdot Z_j^2)]. \quad (37)$$

Combining eq. (36) and eq. (37), we have

$$\mathbb{E}(\max_{j \in [N]} Z_j^2) \leq C^2 \cdot H_\xi^2 \cdot V_{\max}^2 \cdot \log N_\delta, \quad (38)$$

where  $C > 0$  is an absolute constant. Hence, plugging eq. (38) into eq. (30) and eq. (31), we upper bound the second term of eq. (25) by

$$\left| \mathbb{E} \left\{ \sum_{i=1}^n \xi_i \cdot [f_{k^*}(X_i) - (TQ)(X_i)] \right\} \right| \leq \left( \left\{ \mathbb{E} \|\hat{O} - TQ\|_n^2 \right\}^{1/2} + \delta \right) \cdot C \cdot H_\xi \cdot V_{\max} \cdot \sqrt{n \cdot \log N_\delta}. \quad (39)$$

Finally, combining eq. (24), eq. (28) and eq. (39), we obtain the following inequality

$$\begin{aligned} \mathbb{E} [\|\hat{O} - TQ\|_n^2] &\leq \inf_{f \in \mathcal{F}} \mathbb{E} [\|f - TQ\|_n^2] + C_\xi \cdot V_{\max} \cdot \delta \\ &\quad + \left( \left\{ \mathbb{E} \|\hat{O} - (TQ)\| \right\}^{1/2} + \delta \right) \cdot C \cdot H_\xi \cdot V_{\max} + \sqrt{\log N_\delta / n} + 2 \cdot \beta \cdot G^2 \\ &\leq C \cdot V_{\max} \sqrt{\log N_\delta / n} + \inf_{f \in \mathcal{F}} \mathbb{E} [\|f - TQ\|_n^2] + C' \cdot V_{\max} \delta + 2 \cdot \beta \cdot G^2, \end{aligned} \quad (40)$$

where  $C$  and  $C'$  are two constants. Here in the first inequality we take the infimum over  $\mathcal{F}$  because eq. (20) holds for any  $f \in \mathcal{F}$ , and the second inequality holds because  $\log N_\delta \leq n$ .

Now we invoke a fact to obtain the final bound for  $\mathbb{E}[\|\hat{O} - TQ\|_n^2]$  from eq. (40). Let  $a, b$  and  $c$  be positive numbers satisfying  $a^2 \leq 2ab + c$ . For any  $\epsilon \in (0, 1]$ , since  $2ab \leq \frac{\epsilon}{1+\epsilon}a^2 + \frac{1+\epsilon}{\epsilon}b^2$ , we have

$$a^2 \leq (1+\epsilon)^2 \cdot b^2/\epsilon + (1+\epsilon) \cdot c. \quad (41)$$

Therefore, applying eq. (41) to eq. (40) with  $a^2 = \mathbb{E}[\|\hat{O} - TQ\|_n^2]$ ,  $b = C \cdot V_{\max} \cdot \sqrt{\log N}$  and  $c = \inf_{f \in \mathcal{F}} \mathbb{E}[\|f - TQ\|_n^2] + C' \cdot V_{\max} \cdot \delta$ , we obtain

$$\mathbb{E}[\|\hat{O} - TQ\|_n^2] \leq (1+\epsilon) \cdot \inf_{f \in \mathcal{F}} \mathbb{E}[\|f - TQ\|_n^2] + C \cdot V_{\max}^2 \cdot \log N_\delta / (n\epsilon) + C' \cdot V_{\max} \cdot \delta + 2\beta G^2, \quad (42)$$

where  $C$  and  $C'$  are two positive absolute constants. This concludes the first step.

**Step (ii):** In this step, we relate the population risk  $\|\hat{O} - TQ\|_\delta^2$  with  $\mathbb{E}[\|\hat{O} - TQ\|_n^2]$ , which is bounded in the first step. To begin with, we generate  $n$  i.i.d. random variables  $\{\tilde{X}_i = (\tilde{S}_i, \tilde{A}_i)\}_{i \in [n]}$  following  $\sigma$ , independent of  $\{(S_i, A_i, R_i, S'_i)\}_{i \in [n]}$ . Since  $\|\hat{O} - f_{k^*}\|_\infty \leq \delta$ , for any  $x \in \mathcal{S} \times \mathcal{A}$ , we have

$$|[\hat{O}(x) - (TQ)(x)]^2 - [f_{k^*}(x) - (TQ)(x)]^2| = |\hat{O}(x) - f_{k^*}(x)| \cdot |\hat{O}(x) + f_{k^*}(x) - 2(TQ)(x)| \leq 4V_{\max} \cdot \delta, \quad (43)$$

where the last inequality follows from the fact that  $\|TQ\|_\infty \leq V_{\max}$  and  $\|f\|_\infty \leq V_{\max}$  for any  $f \in \mathcal{F}$ .

Then by the definition of  $\|\hat{O} - TQ\|_\delta^2$  and eq. (43), we have

$$\begin{aligned} \|\hat{O} - TQ\|_\sigma^2 &= \mathbb{E} \left\{ \frac{1}{n} \sum_{i=1}^n [\hat{O}(\tilde{X}_i) - (TQ)(\tilde{X}_i)]^2 \right\} \\ &\leq \mathbb{E} \left\{ \|\hat{O} - TQ\|_n^2 + \frac{1}{n} \sum_{i=1}^n [f_{k^*}(\tilde{X}_i) - (TQ)(\tilde{X}_i)]^2 - \frac{1}{n} \sum_{i=1}^n [f_{k^*}(X_i) - (TQ)(\tilde{X}_i)]^2 \right\} + 8V_{\max} \cdot \delta \\ &= \mathbb{E}(\|\hat{O} - TQ\|_n^2) + \mathbb{E} \left[ \frac{1}{n} \sum_{i=1}^n h_{k^*}(X_i, \tilde{X}_i) \right] + 8V_{\max} \cdot \delta, \end{aligned} \quad (44)$$

where we apply eq. (43) to obtain the first inequality, and in the last equality we define

$$h_j(x, y) = [f_j(y) - (TQ)(y)]^2 - [f_j(x) - (TQ)(x)]^2, \quad (45)$$

for any  $x, y \in \mathcal{S} \times \mathcal{A}$  and any  $j \in [N_\delta]$ . Note that  $h_{k^*}$  is a random function since  $k^*$  is random. By the definition of  $h_j$ , we have  $|h_j(x, y)| \leq 4V_{\max}^2$  for any  $(x, y) \in \mathcal{S} \times \mathcal{A}$  and  $\mathbb{E}[h_j(X_i, \tilde{X}_i)] = 0$  for any  $i \in [n]$ . Moreover, the variance of  $h_j(X_i, \tilde{X}_i)$  satisfies

$$\begin{aligned} \text{Var}[h_j(X_i, \tilde{X}_i)] &= 2 \text{Var} \{ [f_j(X_i) - (TQ)(X_i)]^2 \} \\ &\leq 2\mathbb{E} \{ [f_j(X_i) - (TQ)(X_i)]^4 \} \leq 8Y^2 \cdot V_{\max}^2, \end{aligned} \quad (46)$$

where we define  $Y$  by letting

$$Y = \max(4V_{\max}^2 \cdot \log N_\delta / n, \max_{j \in [N_\delta]} \mathbb{E} \{ [f_j(X_i) - (TQ)(X_i)]^2 \}). \quad (47)$$

Furthermore, we define

$$T = \sup_{j \in [N_\delta]} \left| \sum_{i=1}^n h(X_i, \tilde{X}_i) / Y \right|. \quad (48)$$

Combining eq. (44) and eq. (48),

$$\|\hat{O} - TQ\|_\sigma^2 \leq \mathbb{E}[\|\hat{O} - TQ\|_n^2] + Y/n \cdot \mathbb{E}[T] + 8V_{\max} \cdot \delta. \quad (49)$$

In the following, we use Bernstein's Inequality to establish an upper bound for  $\mathbb{E}(T)$ :

**Lemma 7.3.** (Bernstein's Inequality) Let  $U_1, \dots, U_n$  be  $n$  independent random variables satisfying  $\mathbb{E}(U_i) = 0$  and  $\leq$  for all  $i \in [n]$ . Then for any  $t > 0$ , we have

$$\mathbb{P}\left(\left|\sum_{i=1}^n U_i\right| \geq t\right) \leq 2 \exp\left(\frac{-t^2}{2M \cdot t/3 + 2\sigma^2}\right), \quad (50)$$

where  $\sigma^2 = \sum_{i=1}^n$  is the variance of  $\sum_{i=1}^n U_i$ .

We first apply Bernstein's Inequality by setting  $U_i = h_j(X_i, \tilde{X}_i)/Y$  for each  $i \in [n]$ . Then we take a union bound for all  $j \in [N_\delta]$  to obtain

$$\mathbb{P}(T \geq t) = \mathbb{P}\left[\sup_{j \in [N_\delta]} \frac{1}{n} \left|\sum_{i=1}^n h_j(X_i, \tilde{X}_i)/Y\right| \geq t\right] \leq 2N_\delta \cdot \exp\left\{\frac{-t^2}{8V_{\max}^2 \cdot [t/(3Y) + n]}\right\}. \quad (51)$$

Since  $T$  is nonnegative,  $\mathbb{E}(T) = \int_0^\infty \mathbb{P}(T \geq t) dt$ . Thus, for any  $u \in (0, 3Y \cdot n)$ ,

$$\begin{aligned} \mathbb{E}(T) &\leq u + \int_u^\infty \mathbb{P}(T \geq t) dt \leq u + 2N_\delta \int_u^{3Y \cdot n} \exp\left(\frac{-t^2}{16V_{\max}^2 \cdot n}\right) dt + 2N_\delta \int_{3Y \cdot n}^\infty \exp\left(\frac{-3Y \cdot t}{16V_{\max}^2}\right) dt \\ &\leq u + 32N_\delta \cdot V_{\max} \cdot n/u \cdot \exp\left(\frac{-u^2}{16V_{\max}^2 \cdot n}\right) + 32N_\delta \cdot V_{\max}^2/(3Y) \cdot \exp\left(\frac{-9Y^2 \cdot n}{16V_{\max}^2}\right), \end{aligned} \quad (52)$$

where in the second inequality we use the fact that  $\int_s^\infty \exp(-t^2/2) dt \leq 1/s \cdot \exp(-s^2/2)$ . Now we set  $u = 4V_{\max} \sqrt{n \cdot \log N_\delta}$  in eq. (52) and plug in the definition of  $Y$  in eq. (46) to obtain

$$\mathbb{E} \leq 4V_{\max} \log n \cdot N_\delta + 8V_{\max} \sqrt{n/\log N_\delta} + 6V_{\max} \sqrt{n/\log N_\delta} \leq 8V_{\max} \sqrt{n \cdot \log N_\delta}, \quad (53)$$

where the last inequality holds when  $\log N_\delta \geq 4$ . Moreover, the definition of  $Y$  in eq. (46) implies that  $Y \leq \max[2V_{\max} \sqrt{\log N_\delta/n}, \|\hat{O} - TQ\|_\sigma^2 + \delta]$ . In the following, we only need to consider the case where  $Y \leq \|\hat{O} - TQ\|_\sigma + \delta$ , since we already have eq. (18) if  $\|\hat{O} - TQ\| + \delta \leq 2V_{\max} \sqrt{\log N_\delta/n}$ , which concludes the proof.

Then, when  $Y \leq \|\hat{O} - TQ\|_\sigma + \delta$  holds, combining eq. (49) and eq. (53) we have,

$$\begin{aligned} \|\hat{O} - TQ\|_\delta^2 &\leq \mathbb{E}[\|\hat{O} - TQ\|_n^2] + 8V_{\max} \sqrt{\log N_\delta/n} \cdot \|\hat{O} - TQ\|_\delta + 8V_{\max} \sqrt{\log N_\delta/n} \cdot \delta + 8V_{\max} \cdot \delta \\ &\leq \mathbb{E}[\|\hat{O} - TQ\|_n^2] + 8V_{\max} \sqrt{\log N_\delta/n} \cdot \|\hat{O} - TQ\|_\sigma + 16V_{\max} \cdot \delta. \end{aligned} \quad (54)$$

We apply the inequality in eq. (41) to eq. (54) with  $a = \|\hat{O} - TQ\|_\sigma$ ,  $b = 8V_{\max} \sqrt{\log N_\delta/n}$ , and  $c = \mathbb{E}[\|\hat{O} - TQ\|_n^2] + 16V_{\max} \cdot \delta$  we have. Hence we found

$$\|\hat{O} - TQ\|_\sigma^2 \leq (1 + \epsilon) \cdot \mathbb{E}[\|\hat{O} - TQ\|_n^2] + (1 + \epsilon)^2 \cdot 64V_{\max} \cdot \log N_\delta/(n \cdot \epsilon) + (1 + \epsilon) \cdot 18V_{\max} \cdot \delta, \quad (55)$$

which concludes the second step of the proof.

Finally, combining steps (i) and together, i.e., eq. (42) and eq. (55), we conclude that

$$\|\hat{O} - TQ\|_\sigma^2 \leq (1 + \epsilon)^2 \cdot \inf_{f \in \mathcal{F}} \mathbb{E}[\|f - TQ\|_n^2] + C_1 \cdot V_{\max}^2 \cdot \log N_\delta/(n \cdot \epsilon) + C_2 \cdot V_{\max} \cdot \delta + 2\beta G^2, \quad (56)$$

where  $C_1$  and  $C_2$  are two absolute constants. Moreover, since  $Q \in \mathcal{F}$

$$\inf_{f \in \mathcal{F}} \mathbb{E}[\|f - TQ\|_n^2] \leq \sup_{Q \in \mathcal{F}} \left\{ \inf_{f \in \mathcal{F}} \mathbb{E}[\|f - TQ\|_n^2] \right\}, \quad (57)$$

which concludes the proof of theorem 3.3.  $\square$

## 8. Appendix: Experimental Settings

In this section, we provide the experimental settings in detail.

### 8.1. Code

Our project is available at <https://sites.google.com/view/peer-cvpr2023/>.

### 8.2. Experimental Details

Our implementation of PEER coupled with CURL/DrQ is based on the CURL/DrQ codebase.

**Computational resources.** All experiments are conducted on two GPU servers. The first one has 3 Titan XP GPUs and Intel(R) Xeon(R) CPU E5-2640 v4 @ 2.40GHz. The second one has 4 Titan RTX GPUs and an Intel(R) Xeon(R) Gold 6137 CPU @ 3.90GHz. Each run for DMControl takes fifty hours to finish. For PyBullet, MuJoCo, and Atari tasks, it takes 5 hours to finish a run. For PyBullet and MuJoCo suites, we simultaneously launch 70 seeds. For the DMControl and Atari suites, we simultaneously run 15 random seeds.

**How to plot fig. 1.** Before computing the distinguishable representation discrepancy (DRD), the representation of  $Q$ -network is normalized as shown in theorem 7.1. Then we compute DRD in mini-batch samples. We compute the average DRD of mini-batch samples, and plot fig. 1 over five random seeds.

**The source of data in table 2.** The evaluation results of State SAC, PlaNet, Dreamer, SAC+AE, and CURL in table 2 are taken from the original CURL paper [6]. And the results of DrQ are taken from the original DrQ paper [9]. As for the data of DrQ-v2, we took from the authors’ data (link: <https://github.com/facebookresearch/drqv2>) and presented the statistics in the same way as the rest of table 2. Note that the author only provides DrQ-v2 results over nine seeds.

**The source of data in table 3.** The evaluation results of Human, Random, OTRainbow, Eff.Rainbow, and CURL in table 3 are taken from the original CURL paper [6]. And the results of Eff. DQN and DrQ are taken from the original DrQ paper [9].

**Data in fig. 4.** We do not include the DrQ-v2 results in fig. 4 because DrQ is better than DrQ-v2 as shown in table 2.

**Random seeds.** If not otherwise specified, we evaluate each tested algorithm over 10 random seeds to ensure the reproducibility of our experiments. Also, we set all seeds fixed in our experiments.

**Grid world.** The grid world is shown in fig. 3a. If the agent arrives at  $S_T$ , it gets a reward of 10, and other states get a reward of 0. We present the remaining hyper-parameters for the grid world in table 4.

**PyBullet.** When we train the agent on the Pybullet suite, the agent starts by randomly collecting 25,000 states and actions for better exploration. Then we evaluate the agent for ten episodes every 5,000 timesteps. We take the average return of ten episodes as a key evaluation metric. To ensure a fair evaluation of the algorithms, we do not apply any exploration tricks during the evaluation phase (e.g. injecting noise into actions in TD3), because these exploration tricks may harm the performance of tested algorithms. The complete timesteps are 1 million. The results are reported over ten random seeds. For the hyper-parameter  $\beta$  of PEER, we take  $5e - 4$  for every task.

For all algorithms except METD3, we use the author’s implementation [28] or a commonly used public repository [46]. Our implementations of PEER and METD3 are based on TD3 implementation. To fairly evaluate our algorithm, we keep all the original TD3’s hyper-parameters without any modification. For the hyper-parameter of METD3, we set the dropout rate equal to 0.1 as the author [42] did. The soft update style is adopted for METD3, PEER with  $\eta = 0.005$ . We summarize the hyper-parameter settings for the PyBullet suite in table 5.

**MuJoCo.** All experiments on MuJoCo are consistent with the PyBullet settings, except for the code of SAC used. We found that the performance of SAC [45] deteriorates on the MuJoCo suite. Therefore, we use the code of Stable-Baselines3 <sup>1</sup> [60] for SAC implementation with the same hyper-parameters under PyBullet settings.

**DMControl.** We utilize the authors’ implementation of CURL and DrQ without any further modification as we discussed. And we do not change the default hyper-parameters for CURL<sup>2</sup>. For a fair comparison, we keep the hyper-parameters of PEER the same as CURL and DrQ. And the hyper-parameter  $\beta = 5e - 4$  is kept in each environment. We summarize the hyper-parameter settings for the DMControl suite in table 6 and table 7.

**Atari.** Our implementation PEER is based on CURL<sup>3</sup>. For a fair comparison, we keep the hyper-parameters and settings of CURL the same as CURL. And the hyper-parameter  $\beta = 5e - 4$  is kept in each environment. Check table 8 and table 9 for more details.

---

<sup>1</sup>Code: <https://github.com/DLR-RM/stable-baselines3>

<sup>2</sup>Code: <https://github.com/MishaLaskin/curl>

<sup>3</sup>Code: [https://github.com/aravindsrinivas/curl\\_rainbow](https://github.com/aravindsrinivas/curl_rainbow)

### 8.3. Pseudocode for PEER Loss

We provide PyTorch-like pseudocode for the PEER loss as follows.

```

1 def PE_loss_with_PEER(representation, Q, target_representation, target_Q, beta):
2     """
3     representation: shape = Batch_size * N, representation of critic
4     Q: shape = Batch_size * 1, current Q value
5     target_representation: shape = Batch_size * N, representation of critic_target
6     target_Q: shape = Batch_size * 1, target Q value (  $r + \mathcal{E}Q(s', a')$  )
7     beta: a small constant, controlling the regularization effectiveness of PEER
8     """
9     PEER_loss = torch.einsum('ij,ij->i', [representation, target_representation]).mean()
10    PE_loss = torch.nn.functional.mse_loss(Q, target_Q).mean()
11
12    loss = PE_loss + beta * PEER_loss
13    return loss

```

Listing 1. Pytorch-like pseudocode for the PEER loss

| Hyper-parameter                          | Value                              |
|------------------------------------------|------------------------------------|
| <i>Shared hyper-parameters</i>           |                                    |
| State space                              | integer: from 0 to 19              |
| Action space                             | Discrete(4): up, down, left, right |
| Discount ( $\gamma$ )                    | 0.99                               |
| Replay buffer size                       | $10^5$                             |
| Optimizer                                | Adam [61]                          |
| Learning rate for Q-network              | $1 \times 10^{-4}$                 |
| Number of hidden layers for all networks | 2                                  |
| Number of hidden units per layer         | 32                                 |
| Activation function                      | ReLU                               |
| Mini-batch size                          | 64                                 |
| Random starting exploration time steps   | $10^3$                             |
| Target smoothing coefficient ( $\eta$ )  | 0.005                              |
| Gradient Clipping                        | False                              |
| Exploration Method                       | Epsilon-Greedy                     |
| $\epsilon$                               | 0.1                                |
| Evaluation Episode                       | 10                                 |
| Number of Episodes                       | 2000                               |
| <i>PEER</i>                              |                                    |
| PEER coefficient ( $\beta$ )             | $5 \times 10^{-4}$                 |

Table 4. Hyper-parameters settings for Grid World experiments

| Hyper-parameter                          | Value                  |
|------------------------------------------|------------------------|
| <i>Shared hyper-parameters</i>           |                        |
| Discount ( $\gamma$ )                    | 0.99                   |
| Replay buffer size                       | $10^6$                 |
| Optimizer                                | Adam [61]              |
| Learning rate for actor                  | $3 \times 10^{-4}$     |
| Learning rate for critic                 | $3 \times 10^{-4}$     |
| Number of hidden layers for all networks | 2                      |
| Number of hidden units per layer         | 256                    |
| Activation function                      | ReLU                   |
| Mini-batch size                          | 256                    |
| Random starting exploration time steps   | $2.5 \times 10^4$      |
| Target smoothing coefficient ( $\eta$ )  | 0.005                  |
| Gradient Clipping                        | False                  |
| Target update interval ( $d$ )           | 2                      |
| <i>TD3</i>                               |                        |
| Variance of exploration noise            | 0.2                    |
| Variance of target policy smoothing      | 0.2                    |
| Noise clip range                         | $[-0.5, 0.5]$          |
| Delayed policy update frequency          | 2                      |
| <i>PEER</i>                              |                        |
| PEER coefficient ( $\beta$ )             | $5 \times 10^{-4}$     |
| <i>SAC</i>                               |                        |
| Target Entropy                           | - dim of $\mathcal{A}$ |
| Learning rate for $\alpha$               | $1 \times 10^{-4}$     |

Table 5. Hyper-parameters settings for PyBullet and MuJoCo experiments

| Hyper-parameter                                               | Value                                                              |
|---------------------------------------------------------------|--------------------------------------------------------------------|
| PEER coefficient ( $\beta$ )                                  | $5 \times 10^{-4}$                                                 |
| Discount $\gamma$                                             | 0.99                                                               |
| Replay buffer size                                            | 100000                                                             |
| Optimizer                                                     | Adam                                                               |
| Learning rate                                                 | $1 \times 10^{-4}$                                                 |
| Learning rate ( $f_\theta, \pi_\psi, Q_\phi$ )                | $2 \times 10^{-4}$ cheetah, run<br>$1 \times 10^{-3}$ otherwise    |
| Convolutional layers                                          | 4                                                                  |
| Number of filters                                             | 32                                                                 |
| Activation function                                           | ReLU                                                               |
| Encoder EMA $\eta$                                            | 0.05                                                               |
| Q function EMA ( $\eta$ )                                     | 0.01                                                               |
| Mini-batch size                                               | 512                                                                |
| Target Update interval ( $d$ )                                | 2                                                                  |
| Latent dimension                                              | 50                                                                 |
| Initial temperature                                           | 0.99                                                               |
| Number of hidden units per layer (MLP)                        | 1024                                                               |
| Evaluation episodes                                           | 10                                                                 |
| Random crop                                                   | True                                                               |
| Observation rendering                                         | (100,100)                                                          |
| Observation downsampling                                      | (84,84)                                                            |
| Initial steps                                                 | 1000                                                               |
| Stacked frames                                                | 3                                                                  |
| Action repeat                                                 | 2 finger, spin; walker, walk<br>8 cartpole, swingup<br>4 otherwise |
| $(\beta_1, \beta_2) \rightarrow (f_\theta, \pi_\psi, Q_\phi)$ | (.9, .999)                                                         |
| $(\beta_1, \beta_2) \rightarrow (\alpha)$                     | (.9, .999)                                                         |

Table 6. Hyper-parameters settings for PEER (coupled with CURL) DMControl experiments.

| Hyper-parameter                           | Value              |
|-------------------------------------------|--------------------|
| PEER coefficient ( $\beta$ )              | $5 \times 10^{-4}$ |
| Replay buffer capacity                    | 100000             |
| Seed steps                                | 1000               |
| Main results minibatch size               | 512                |
| Discount $\gamma$                         | 0.99               |
| Optimizer                                 | Adam               |
| Learning rate                             | $10^{-3}$          |
| Critic target update frequency            | 2                  |
| Critic Q-function soft-update rate $\tau$ | 0.01               |
| Actor update frequency                    | 2                  |
| Actor log stddev bounds                   | $[-10, 2]$         |
| Init temperature                          | 0.1                |

Table 7. Hyper-parameters settings for PEER (coupled with DrQ) DMControl experiments.

| Hyper-parameter                  | Value                    |
|----------------------------------|--------------------------|
| PEER coefficient ( $\beta$ )     | $5 \times 10^{-4}$       |
| Random crop                      | True                     |
| Image size                       | (84, 84)                 |
| Data Augmentation                | Random Crop (Train)      |
| Replay buffer size               | 100000                   |
| Training frames                  | 400000                   |
| Training steps                   | 100000                   |
| Frame skip                       | 4                        |
| Stacked frames                   | 4                        |
| Action repeat                    | 4                        |
| Replay period every              | 1                        |
| Q network: channels              | 32, 64                   |
| Q network: filter size           | $5 \times 5, 5 \times 5$ |
| Q network: stride                | 5, 5                     |
| Q network: hidden units          | 256                      |
| Momentum (EMA for CURL) $\tau$   | 0.001                    |
| Non-linearity                    | ReLU                     |
| Reward Clipping                  | $[-1, 1]$                |
| Multi step return                | 20                       |
| Minimum replay size for sampling | 1600                     |
| Max frames per episode           | 108K                     |
| Update                           | Distributional Double Q  |
| Target Network Update Period     | every 2000 updates       |
| Support-of-Q-distribution        | 51 bins                  |
| Discount $\gamma$                | 0.99                     |
| Batch Size                       | 32                       |
| Optimizer                        | Adam                     |
| Optimizer: learning rate         | 0.0001                   |
| Optimizer: $\beta_1$             | 0.9                      |
| Optimizer: $\beta_2$             | 0.999                    |
| Optimizer $\epsilon$             | 0.000015                 |
| Max gradient norm                | 10                       |
| Exploration                      | Noisy Nets               |
| Noisy nets parameter             | 0.1                      |
| Priority exponent                | 0.5                      |
| Priority correction              | $0.4 \rightarrow 1$      |
| Hardware                         | GPU                      |

Table 8. Hyper-parameters used for Atari100K PEER (coupled with CURL) experiments.

| Hyperparameter                | Value                                |
|-------------------------------|--------------------------------------|
| PEER coefficient ( $\beta$ )  | $5 \times 10^{-4}$                   |
| Data augmentation             | Random shifts and Intensity          |
| Grey-scaling                  | True                                 |
| Observation down-sampling     | $84 \times 84$                       |
| Frames stacked                | 4                                    |
| Action repetitions            | 4                                    |
| Reward clipping               | $[-1, 1]$                            |
| Terminal on loss of life      | True                                 |
| Max frames per episode        | 108k                                 |
| Update                        | Double Q                             |
| Dueling                       | True                                 |
| Target network: update period | 1                                    |
| Discount factor               | 0.99                                 |
| Minibatch size                | 32                                   |
| Optimizer                     | Adam                                 |
| Optimizer: learning rate      | 0.0001                               |
| Optimizer: $\beta_1$          | 0.9                                  |
| Optimizer: $\beta_2$          | 0.999                                |
| Optimizer: $\epsilon$         | 0.00015                              |
| Max gradient norm             | 10                                   |
| Training steps                | 100k                                 |
| Evaluation steps              | 125k                                 |
| Min replay size for sampling  | 1600                                 |
| Memory size                   | Unbounded                            |
| Replay period every           | 1 step                               |
| Multi-step return length      | 10                                   |
| Q network: channels           | 32, 64, 64                           |
| Q network: filter size        | $8 \times 8, 4 \times 4, 3 \times 3$ |
| Q network: stride             | 4, 2, 1                              |
| Q network: hidden units       | 512                                  |
| Non-linearity                 | ReLU                                 |
| Exploration                   | $\epsilon$ -greedy                   |
| $\epsilon$ -decay             | 5000                                 |

Table 9. Hyper-parameters used for Atari100K PEER (coupled with DrQ algorithm) experiments.

## 9. Appendix: Experimental Suites

The experimental suites we use are Bullet [29], MuJoCo[31], DMcontrol[30], and Atari[32]. We show the environments of bullet, MuJoCo, DMControl, and Atari in fig. 6, fig. 7, fig. 8, fig. 9, and fig. 10, respectively.

Besides, We list the state and action information for the four suites in table 10, table 11, table 12, and table 13. respectively.

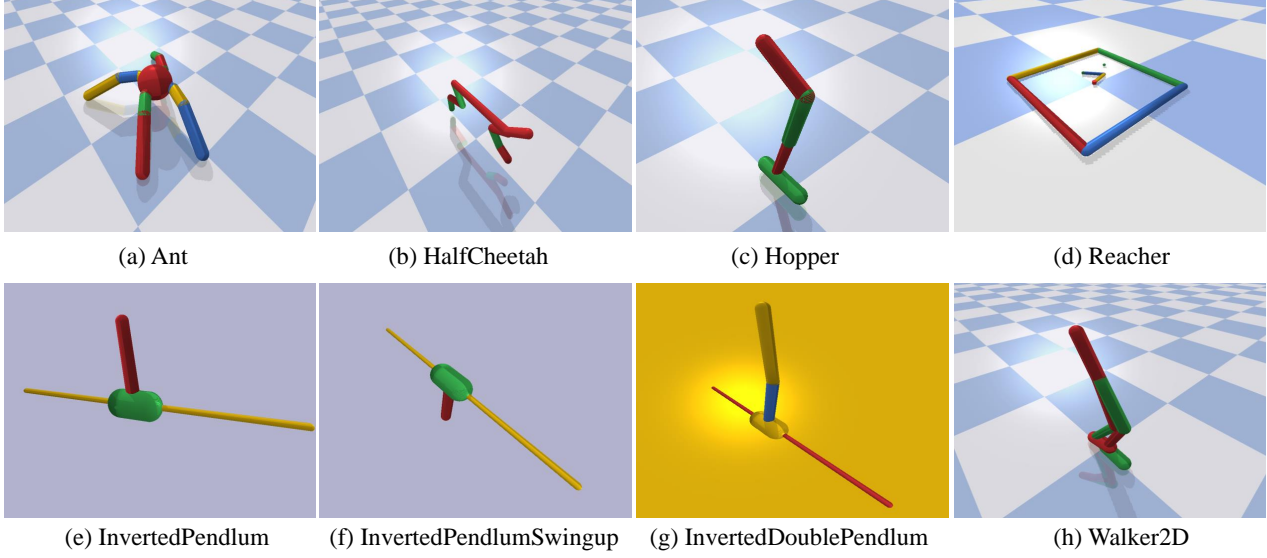

Figure 6. Images for PyBullet suite used in our experiments. The states for this suite are vectors.

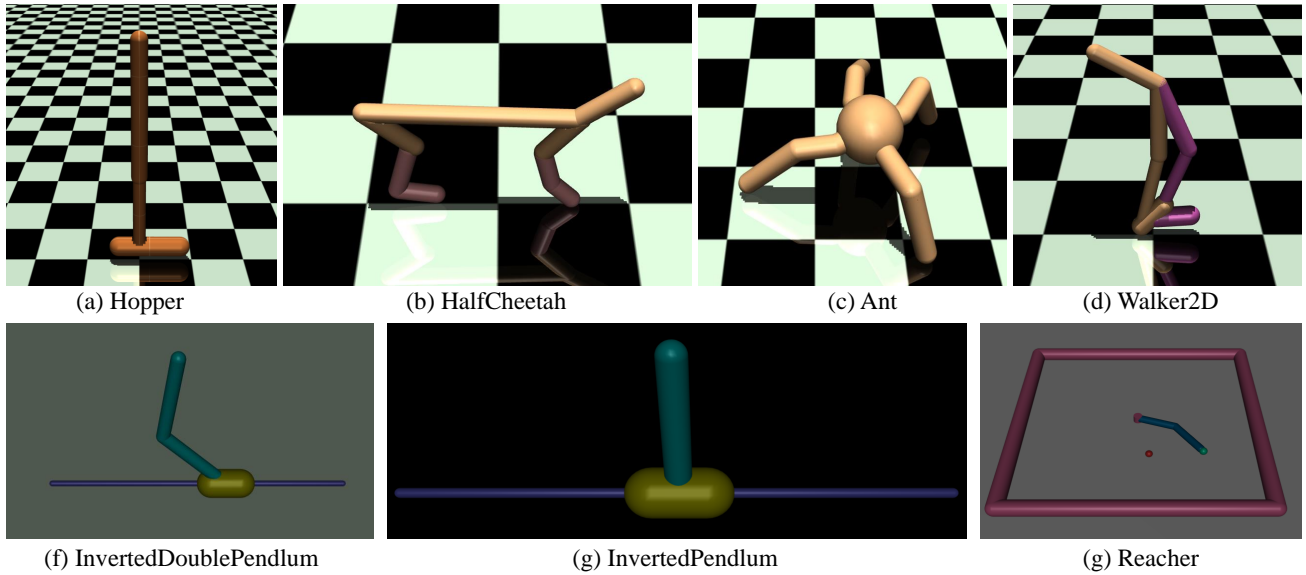

Figure 7. Images for MuJoCo suite used in our experiments. The states for this suite are vectors.

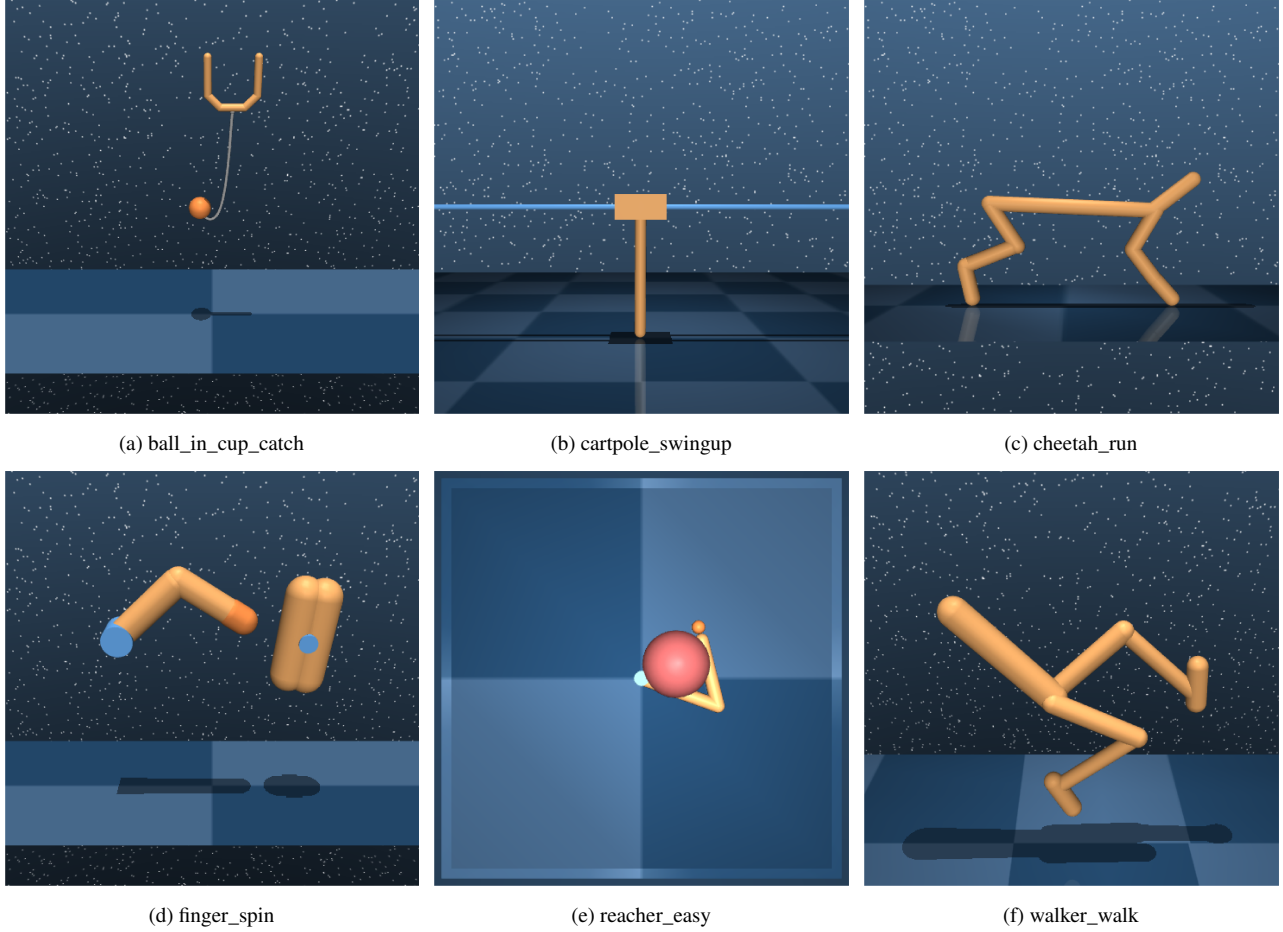

Figure 8. Images for DMControl suites used in our experiments. Each image is a frame of a specific DMControl suite.

| Env                     | State Dimension | Action Dimension |
|-------------------------|-----------------|------------------|
| InvertedPendulum        | 5               | Continuous(1)    |
| InvertedDoublePendulum  | 9               | Continuous(1)    |
| InvertedPendulumSwingup | 5               | Continuous(1)    |
| Reacher                 | 9               | Continuous(2)    |
| Walker2D                | 22              | Continuous(6)    |
| HalfCheetah             | 26              | Continuous(6)    |
| Ant                     | 28              | Continuous(8)    |
| Hopper                  | 15              | Continuous(3)    |

Table 10. State dimension and action space for Bullet suite. Continuous( $x$ ) means the action space is continuous with dimension  $x$ .

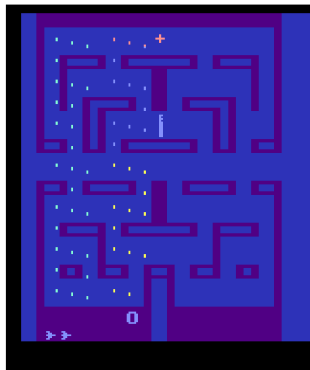

(a) Alien

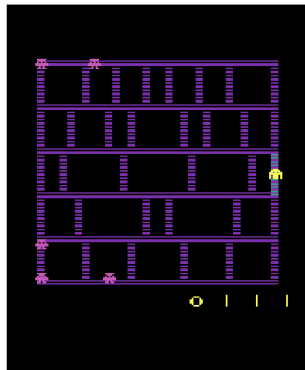

(b) Amidar

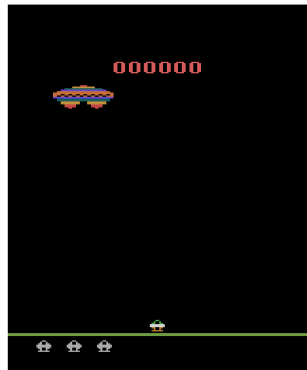

(c) Assault

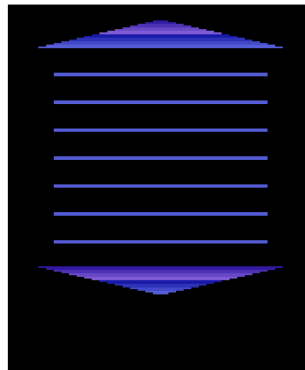

(d) Asterix

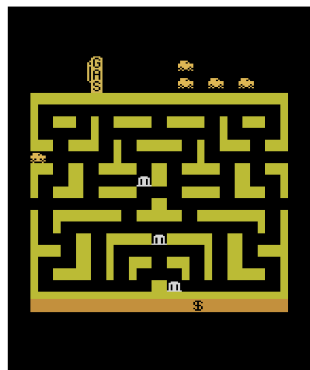

(e) BankHeist

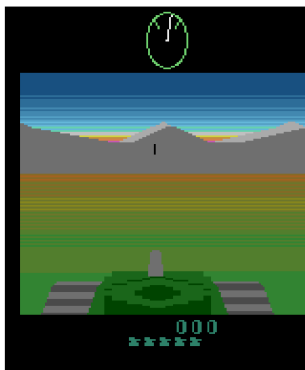

(f) BattleZone

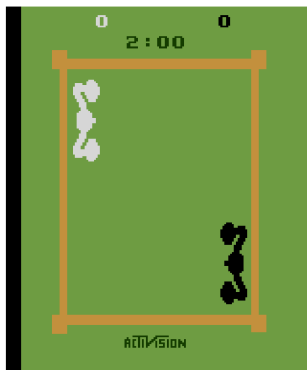

(g) Boxing

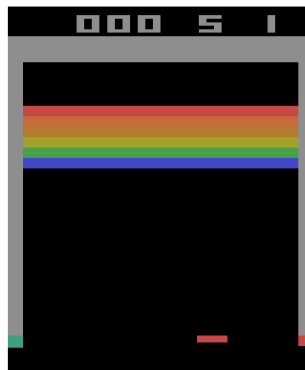

(h) Breakout

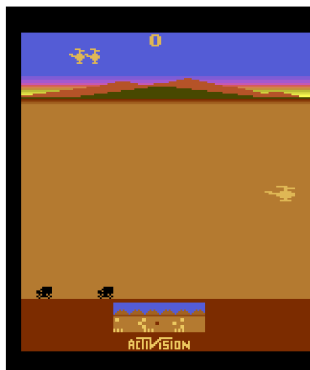

(i) ChopperCommand

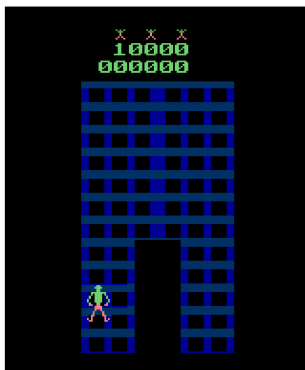

(j) CrazyClimber

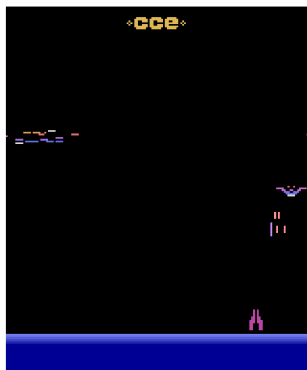

(k) DemonAttack

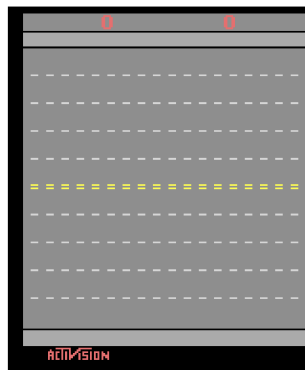

(l) Freeway

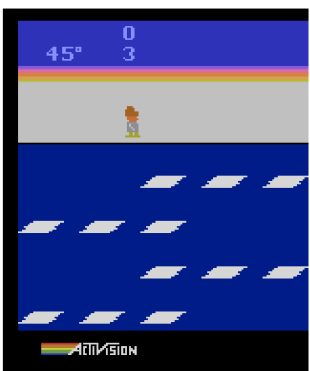

(m) Frostbite

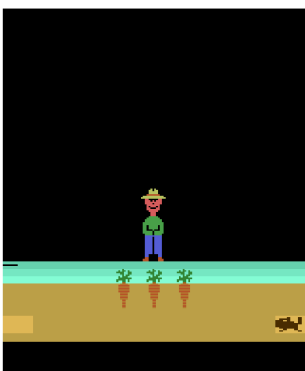

(n) Gopher

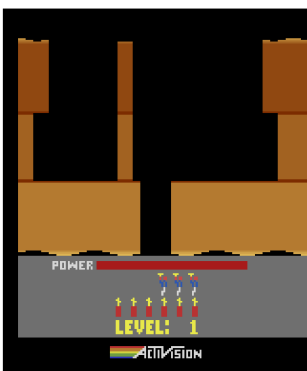

(o) Hero

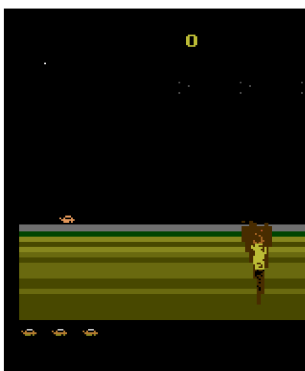

(p) Jamesbond

Figure 9. Images for Atari100k suites used in our experiments. Each image is a frame of a specific Atari game.

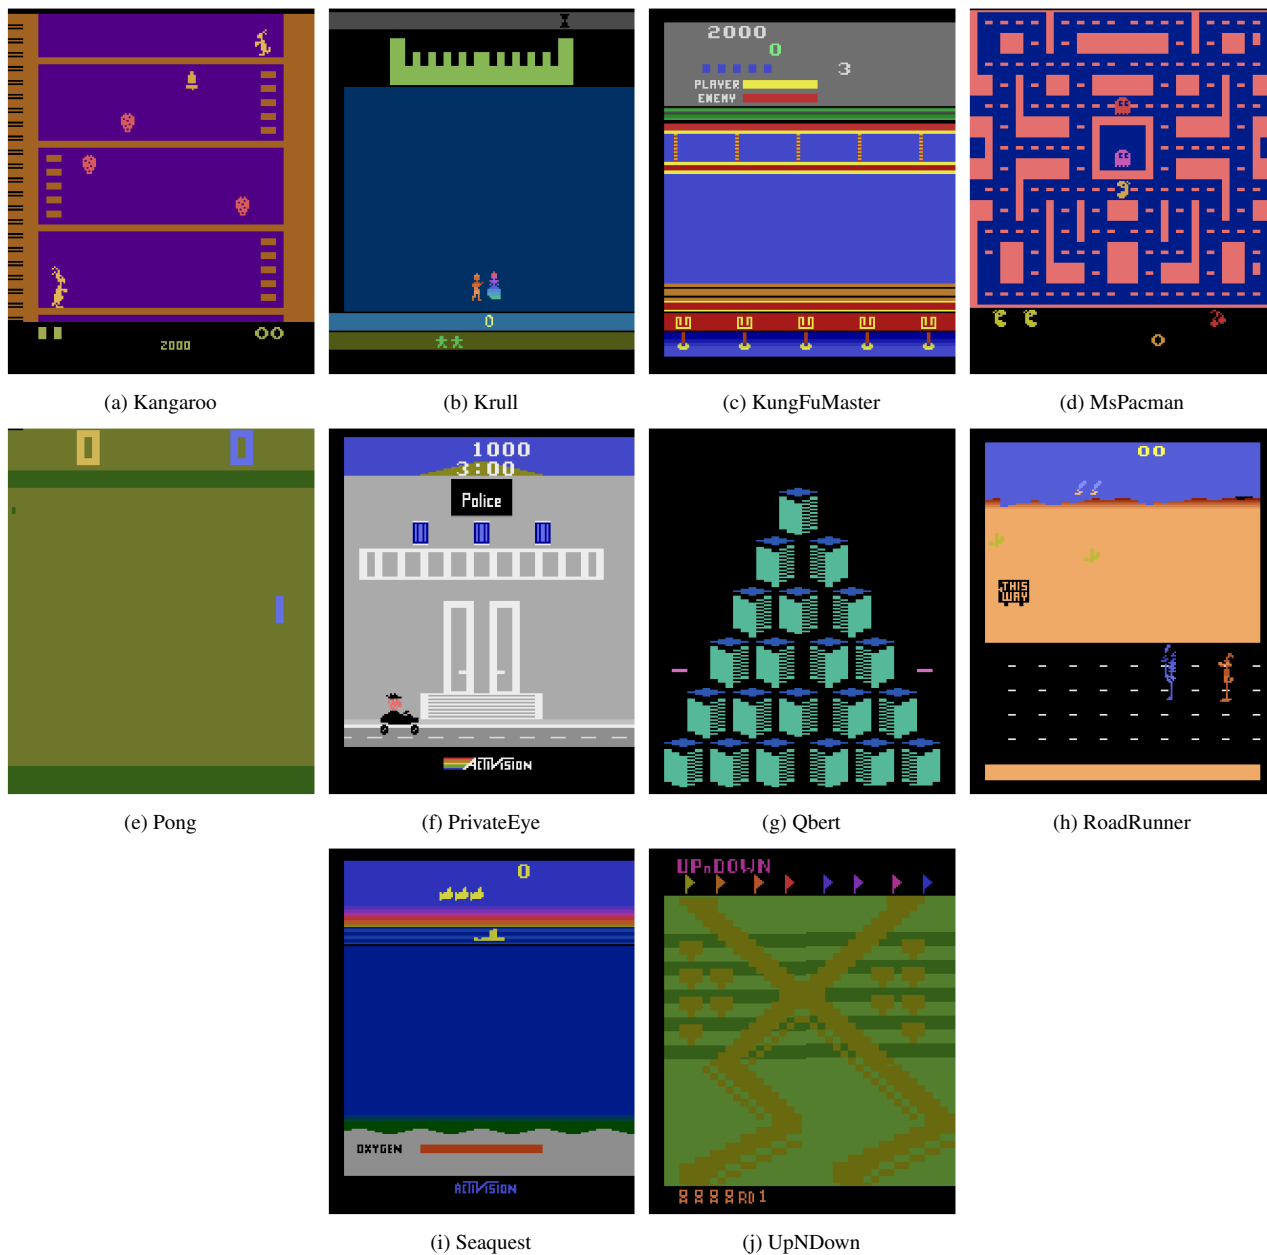

Figure 10. Images for Atari100k suites used in our experiments (continuation of fig. 9). Each image is a frame of a specific Atari game.

| Env                    | State Dimension | Action Dimension |
|------------------------|-----------------|------------------|
| Reacher                | 11              | Continuous(2)    |
| Walker2d               | 17              | Continuous(6)    |
| HalfCheetah            | 17              | Continuous(6)    |
| Swimmer                | 8               | Continuous(2)    |
| Ant                    | 111             | Continuous(8)    |
| Hopper                 | 11              | Continuous(3)    |
| InvertedPendulum       | 4               | Continuous(1)    |
| InvertedDoublePendulum | 11              | Continuous(1)    |

Table 11. State space and action space for MuJoCo suite. Continuous( $x$ ) means the action space is continuous with dimension  $x$ .

| Domain      | Tasks          | State Space   | Action Space  |
|-------------|----------------|---------------|---------------|
| ball_in_cup | catch          | (3, 100, 100) | Continuous(2) |
| cartpole    | balance        | (3, 100, 100) | Continuous(1) |
| cartpole    | balance_sparse | (3, 100, 100) | Continuous(1) |
| cartpole    | swingup        | (3, 100, 100) | Continuous(1) |
| cartpole    | swingup_sparse | (3, 100, 100) | Continuous(1) |
| cheetah     | run            | (3, 100, 100) | Continuous(6) |
| finger      | spin           | (3, 100, 100) | Continuous(2) |
| finger      | turn_easy      | (3, 100, 100) | Continuous(2) |
| finger      | turn_hard      | (3, 100, 100) | Continuous(2) |
| hopper      | hop            | (3, 100, 100) | Continuous(4) |
| hopper      | stand          | (3, 100, 100) | Continuous(4) |
| pendulum    | swingup        | (3, 100, 100) | Continuous(1) |
| reacher     | easy           | (3, 100, 100) | Continuous(2) |
| reacher     | hard           | (3, 100, 100) | Continuous(2) |
| walker      | stand          | (3, 100, 100) | Continuous(6) |
| walker      | walk           | (3, 100, 100) | Continuous(6) |

Table 12. State space and action space for DMControl suite. Continuous( $x$ ) means the action space is continuous with dimension  $x$ .

| <b>Game</b>    | State Space   | Action Space |
|----------------|---------------|--------------|
| Alien          | (210, 160, 3) | Discrete(18) |
| Amidar         | (210, 160, 3) | Discrete(10) |
| Assault        | (210, 160, 3) | Discrete(7)  |
| Asterix        | (210, 160, 3) | Discrete(9)  |
| BankHeist      | (210, 160, 3) | Discrete(18) |
| BattleZone     | (210, 160, 3) | Discrete(18) |
| Boxing         | (210, 160, 3) | Discrete(18) |
| Breakout       | (210, 160, 3) | Discrete(4)  |
| ChopperCommand | (210, 160, 3) | Discrete(18) |
| CrazyClimber   | (210, 160, 3) | Discrete(9)  |
| DemonAttack    | (210, 160, 3) | Discrete(6)  |
| Freeway        | (210, 160, 3) | Discrete(3)  |
| Frostbite      | (210, 160, 3) | Discrete(18) |
| Gopher         | (210, 160, 3) | Discrete(8)  |
| Hero           | (210, 160, 3) | Discrete(18) |
| Jamesbond      | (210, 160, 3) | Discrete(18) |
| Kangaroo       | (210, 160, 3) | Discrete(18) |
| Krull          | (210, 160, 3) | Discrete(18) |
| KungFuMaster   | (210, 160, 3) | Discrete(14) |
| MsPacman       | (210, 160, 3) | Discrete(9)  |
| Pong           | (210, 160, 3) | Discrete(6)  |
| PrivateEye     | (210, 160, 3) | Discrete(18) |
| Qbert          | (210, 160, 3) | Discrete(6)  |
| RoadRunner     | (210, 160, 3) | Discrete(18) |
| Seaquest       | (210, 160, 3) | Discrete(18) |
| UpNDown        | (210, 160, 3) | Discrete(6)  |

Table 13. State space and action space for Atari suite. Discrete( $x$ ) means the action space is discrete with  $x$  actions.

## 10. Appendix: Additional Experimental Results

In this section, we provide additional experimental results. PEER works by adding a regularization term to backbone DRL algorithms. Thus, the comparison with the backbone algorithm of PEER naturally becomes an ablation experiment. We provide more experiments to demonstrate the effectiveness of PEER.

### 10.1. Experiments on MuJoCo Suite

We present the performance of PEER on the MuJoCo suite in table 14. The results show that our proposed PEER outperforms or matches the compared algorithms in 5 out of 7 MuJoCo environments. Compared with its backbone algorithm TD3, PEER surpasses it in 6 out of 7 environments.

| Algorithm | Ant                   | HalfCheetah            | Hopper                | InvDouPen           | InvPen              | Reacher           | Walker                |
|-----------|-----------------------|------------------------|-----------------------|---------------------|---------------------|-------------------|-----------------------|
| PEER      | <b>5386</b> $\pm 493$ | 10832 $\pm 501$        | <b>3424</b> $\pm 180$ | 7470 $\pm 3721$     | <b>1000</b> $\pm 0$ | <b>-4</b> $\pm 1$ | <b>4223</b> $\pm 655$ |
| TD3       | 5102 $\pm 787$        | <b>10858</b> $\pm 637$ | 3163 $\pm 367$        | 7312 $\pm 3653$     | 1000 $\pm 0$        | -4 $\pm 1$        | 3762 $\pm 956$        |
| METD3     | 2256 $\pm 431$        | 5696 $\pm 1740$        | 804 $\pm 71$          | 7815 $\pm 0$        | 912 $\pm 71$        | -8 $\pm 3$        | 2079 $\pm 1096$       |
| SAC       | 4233 $\pm 806$        | 10482 $\pm 959$        | 2666 $\pm 320$        | <b>9358</b> $\pm 0$ | 1000 $\pm 0$        | -4 $\pm 0$        | 4187 $\pm 304$        |

Table 14. The average return of the last ten evaluations over ten random seeds. The maximum average returns are bolded. PEER outperforms or matches the other tested algorithms in 5 out of 7 environments.

In table 15, we show comparisons with model-free algorithm REDQ [62] on pybullet suite.

| Algo | Ant                   | Hopper                | Walker                |
|------|-----------------------|-----------------------|-----------------------|
| PEER | <b>5386</b> $\pm 493$ | <b>3424</b> $\pm 180$ | <b>4223</b> $\pm 655$ |
| REDQ | 3900 $\pm 890$        | 2656 $\pm 759$        | 4211 $\pm 524$        |

Table 15. Average return for PEER and REDQ. PEER surpasses REDQ on all tested tasks. The REDQ results are obtained using the authors’ implementation and are reported over 20 trials.

### 10.2. Combination with Model-based Algorithm

In table 16, we show comparisons with model-based methods algorithms TDMPC and Dreamer-v2 on DMControl suites. In table 17, we show comparisons with model-based algorithms Dreamer-v2. Note that the data we take directly from the authors’ dreamer-v2 codebase (<https://github.com/danijar/dreamerv2/tree/main/scores>), the amount of data they use is 1000k, which is 10 times more than our PEER. The PEER scores in table 17 are taken as the largest of PEER+DrQ and PEER+CURL.

| 500K Step Scores | Finger, Spin         | Cartpole, Swingup   | Reacher, Easy        | Cheetah, run        | Walker, Walk        | Ball_in_cup, Catch  |
|------------------|----------------------|---------------------|----------------------|---------------------|---------------------|---------------------|
| PEER + CURL      | <b>864</b> $\pm 160$ | <b>866</b> $\pm 17$ | <b>980</b> $\pm 3$   | <b>732</b> $\pm 41$ | <b>946</b> $\pm 17$ | <b>971</b> $\pm 5$  |
| Dreamer-V2       | 386 $\pm 83$         | 853 $\pm 15$        | 876 $\pm 60$         | 610 $\pm 117$       | 934 $\pm 16$        | 792 $\pm 300$       |
| 100K Step Scores |                      |                     |                      |                     |                     |                     |
| PRER +TDMPC      | 772 $\pm 107$        | <b>848</b> $\pm 25$ | <b>841</b> $\pm 115$ | <b>636</b> $\pm 35$ | <b>876</b> $\pm 41$ | <b>937</b> $\pm 96$ |
| TDMPC            | <b>943</b> $\pm 59$  | 770 $\pm 70$        | 628 $\pm 105$        | 222 $\pm 88$        | 577 $\pm 208$       | 933 $\pm 24$        |
| Dreamer-V2       | 414 $\pm 93$         | 697 $\pm 176$       | 633 $\pm 248$        | 501 $\pm 146$       | 705 $\pm 232$       | 693 $\pm 335$       |

Table 16. Comparison with model-based methods. PEER outperforms Dreamer-v2 on 12 out of 12 tasks. PEER (combined with TDMPC [63]) outperforms TDMPC by on 5 out of 6 tasks.

| Game      | PEER    | Dreamer-V2 | MuZero  |
|-----------|---------|------------|---------|
| Alien     | 1218.9  | 384.1      | 530.0   |
| Amidar    | 185.2   | 29.8       | 38.8    |
| Assault   | 721.0   | 433.4      | 500.1   |
| Asterix   | 918.2   | 330.6      | 1734.0  |
| BHeist    | 78.6    | 127.1      | 192.5   |
| BZone     | 15727.3 | 4200.0     | 7687.5  |
| Boxing    | 14.5    | 37.7       | 15.1    |
| Breakout  | 8.5     | 1.5        | 48.0    |
| ChpCmd    | 1451.8  | 687.5      | 1350.0  |
| CzClmr    | 18922.7 | 25232.5    | 56937.0 |
| DmAttack  | 1236.7  | 182.9      | 3527.0  |
| Freeway   | 30.4    | 11.6       | 21.8    |
| Frostbite | 2151.0  | 302.5      | 255.0   |
| Gopher    | 681.8   | 820.2      | 1256.0  |
| Hero      | 7499.9  | 2185.0     | 3095.0  |
| Jbond     | 414.1   | 81.2       | 87.5    |
| Kangaroo  | 1148.2  | 150.0      | 62.5    |
| Krull     | 5444.7  | 3853.8     | 4890.8  |
| KFMaster  | 15439.1 | 12420.3    | 18813.0 |
| MsPacman  | 1768.4  | 647.9      | 1265.6  |
| Pong      | -9.5    | -18.3      | -6.7    |
| PriEye    | 3207.7  | 188.8      | 56.3    |
| Qbert     | 2197.7  | 318.6      | 3952.0  |
| RdRunner  | 10697.3 | 3622.5     | 2500.0  |
| Squest    | 538.5   | 356.0      | 208.0   |
| UpNDown   | 7680.9  | 8025.1     | 2896.9  |

Table 17. PEER outperforms Dreamer-v2 and Muzero on 21 and 16 games of Atari26 where Dreamer-v2 even uses 10 times the data of PEER. Note that the data we take directly from the authors’ dreamer-v2 codebase, the amount of data for Dreamer-V2 they use is 1000k, which is 10 times more than our PEER.

### 10.3. Various $\beta$ for Performance Improvement

Fine-tuning for hyper-parameters probably improves the performance of PEER. To see this, we select 7 Atari environments to investigate the effect of fine-tuning  $\beta$ , where PEER (coupled with CURL) achieves SOTA performance. We present the results in fig. 11. There is no one value taken that is significantly better than the other. We see that large  $\beta$  ( $=1e-2$ ) may result in the failure of learning (on Freeway game) but may also bring the best performance improvements (on Kangaroo game). Overall, fine-tuning the hyper-parameter  $\beta$  may improve the empirical performance by a large margin.

### 10.4. Performance curves on DMControl Tasks

We present the performance curves of PEER on a total of 16 DMControl environments in fig. 12 and fig. 13. We run 10 seeds in each environment.

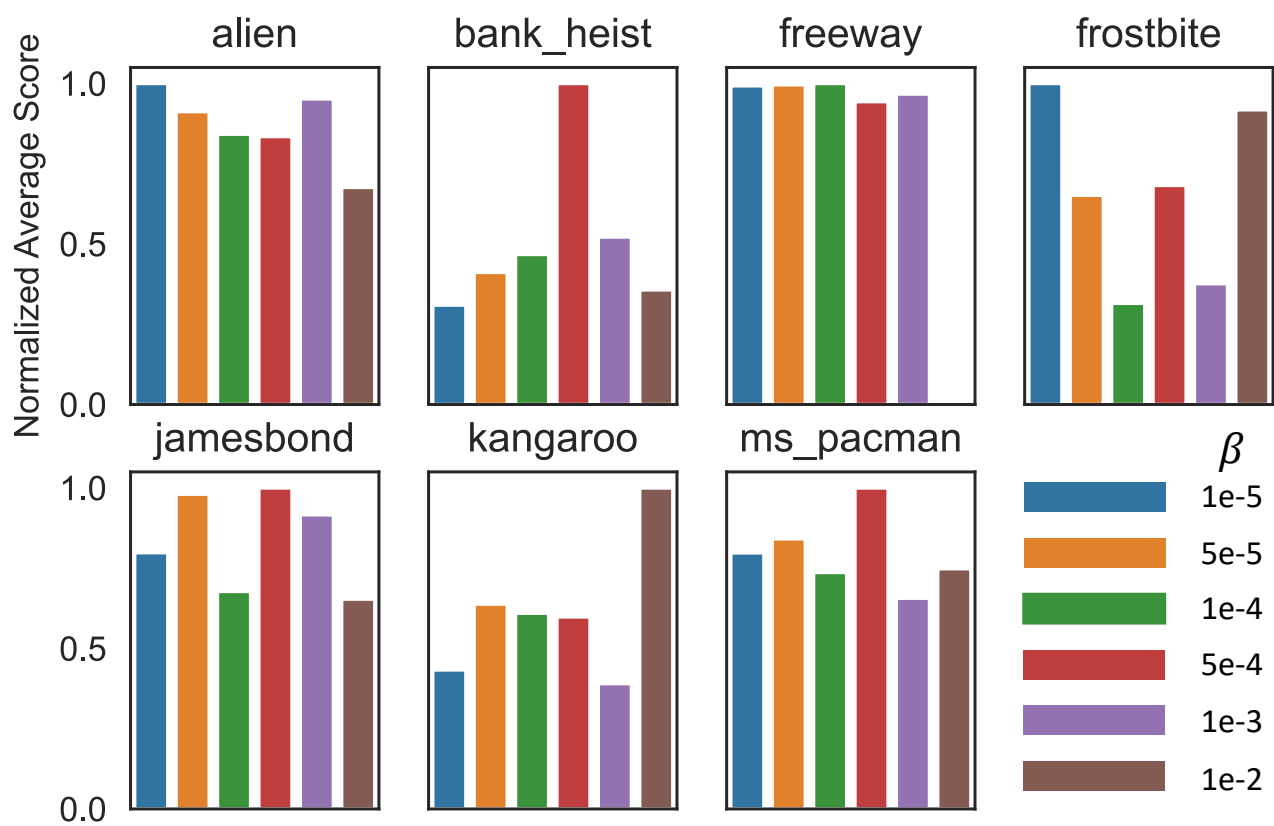

Figure 11. The average scores normalized by the max average score on the 7 Atari games for selected 6 hyper-parameter  $\beta$ . From the experiments, we can see that fine-tuning the  $\beta$  may result in performance improvements.

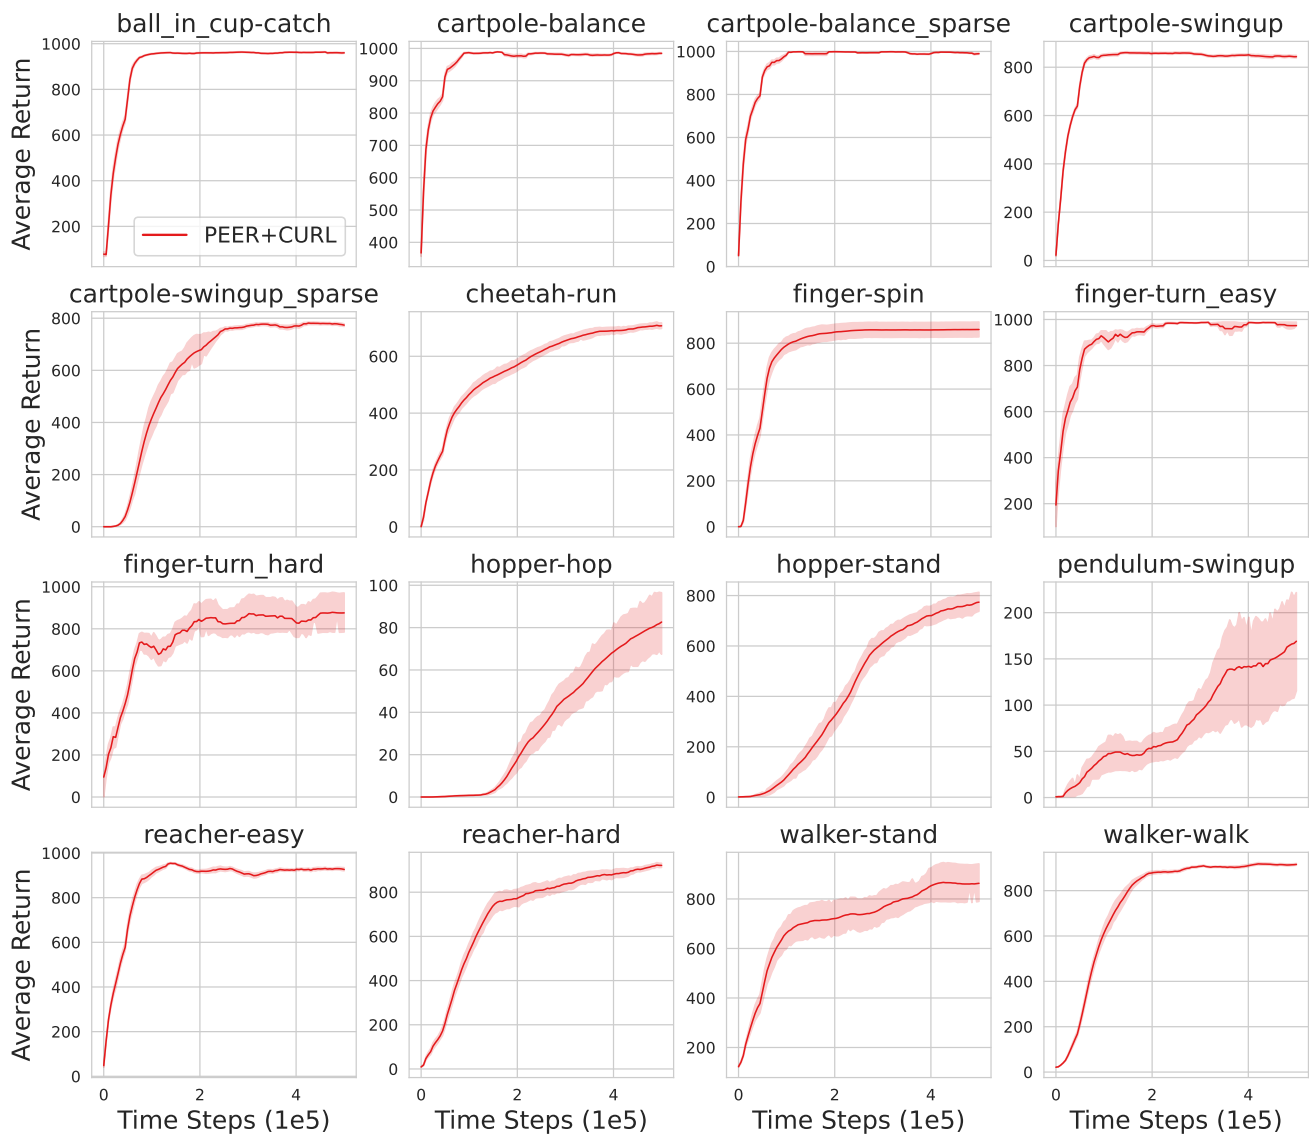

Figure 12. Performance curves for PEER (coupled with CURL) on DMControl suite. The shaded region represents half the standard deviation of the average evaluation over 10 seeds. The curves are smoothed by moving average.

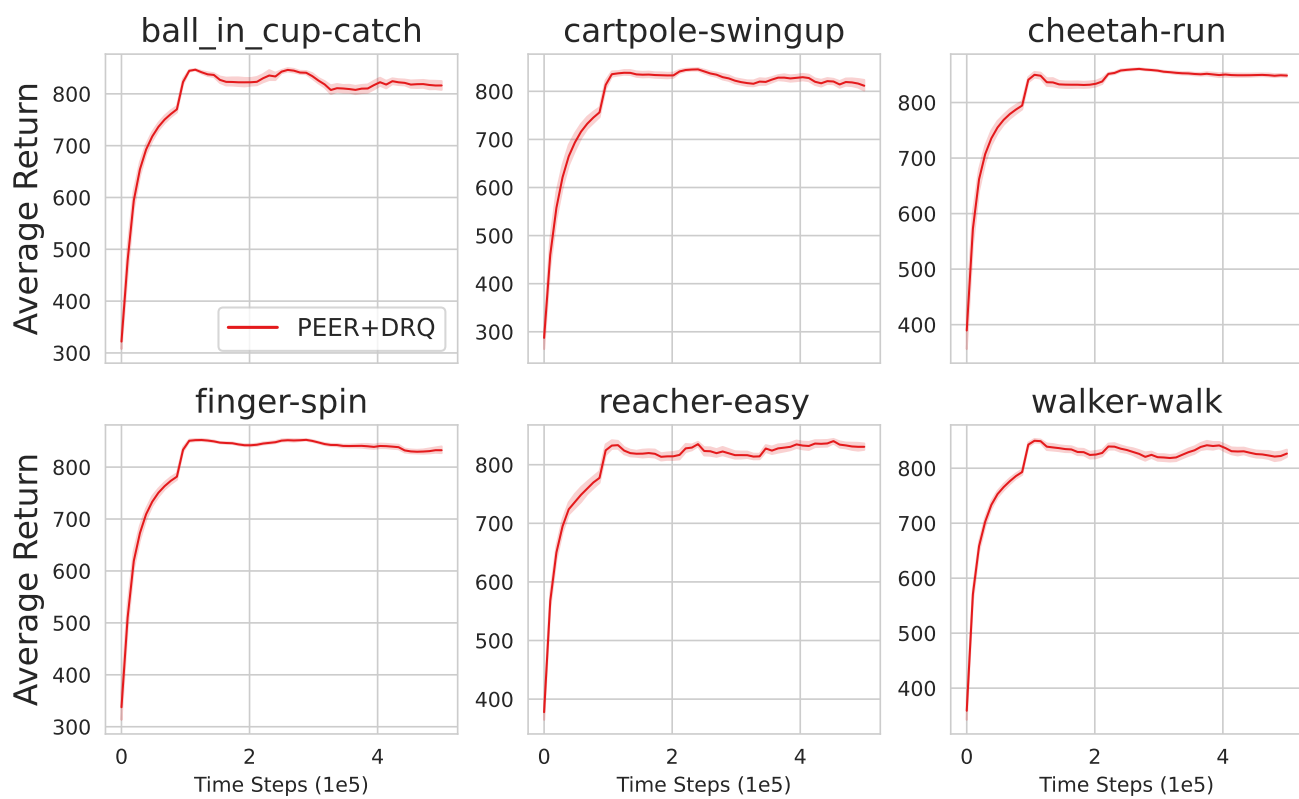

Figure 13. Performance curves for PEER (coupled with DrQ) on DMControl suite. The shaded region represents half the standard deviation of the average evaluation over 10 seeds. The curves are smoothed by moving average.
